# Supplementary figures and images for: Molecular modeling and nonlinear optical properties of new isostructural halogenated dihydroquinolinones
Source: Royal Society of Chemistry journal article supplement (doi:10.1039/d2nj00501h), 2022-01-01

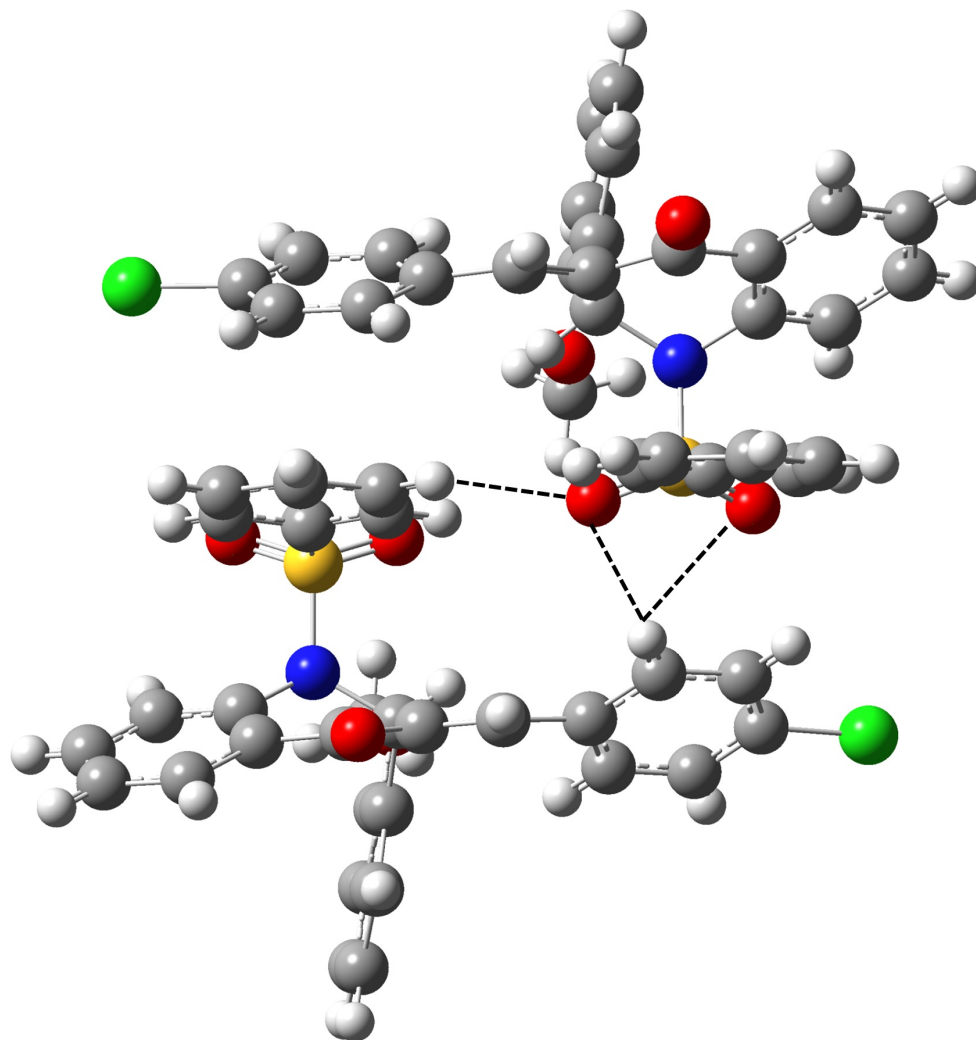

Supplement: d2nj00501h11.pdf [file d2nj00501h11.pdf]

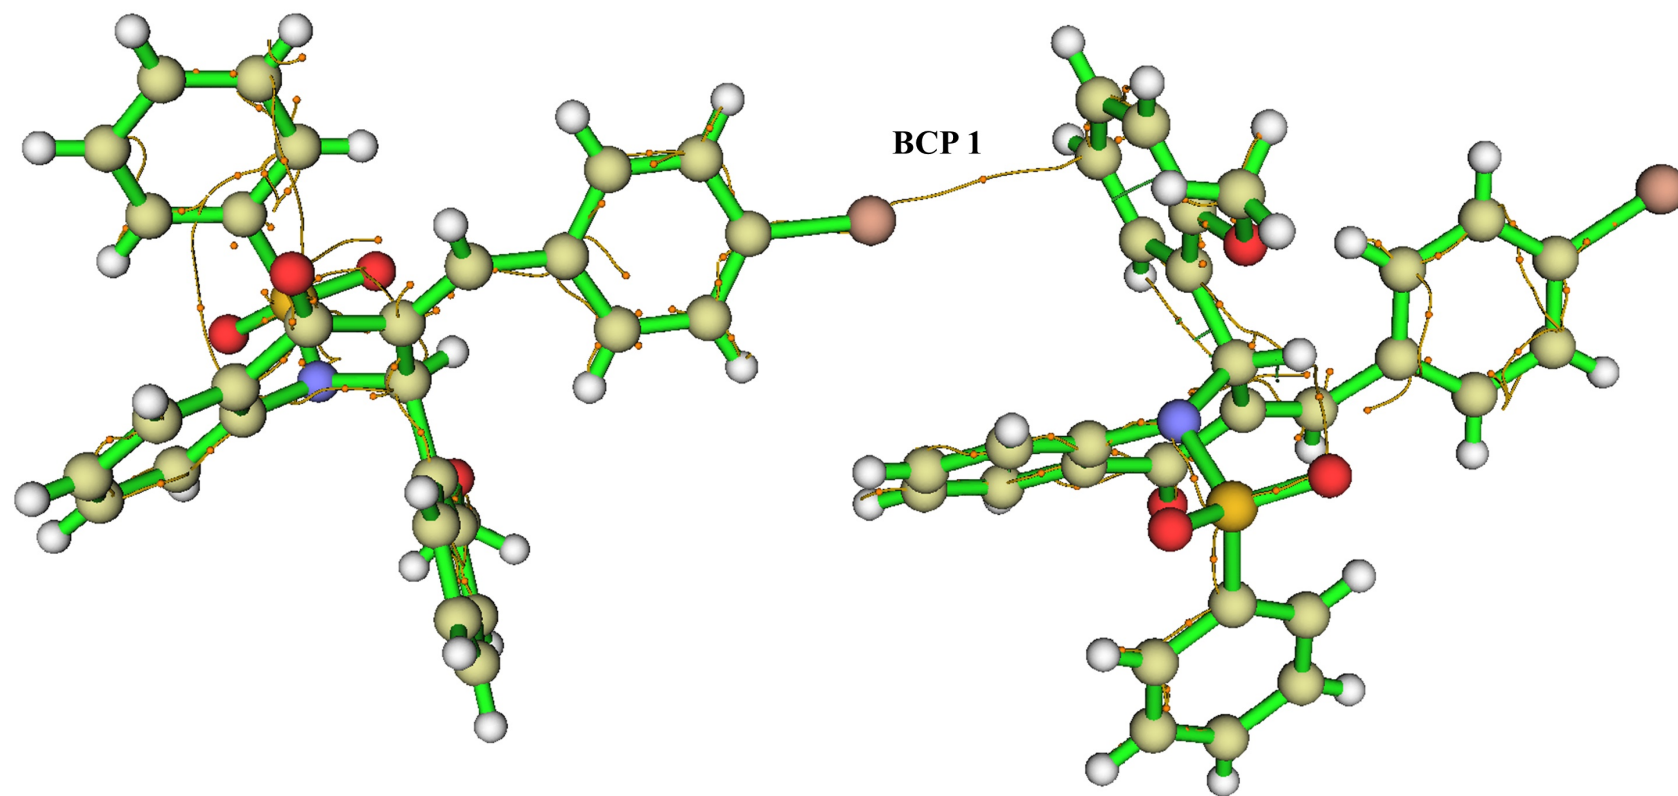

Supplement: d2nj00501h12.pdf [file d2nj00501h12.pdf]

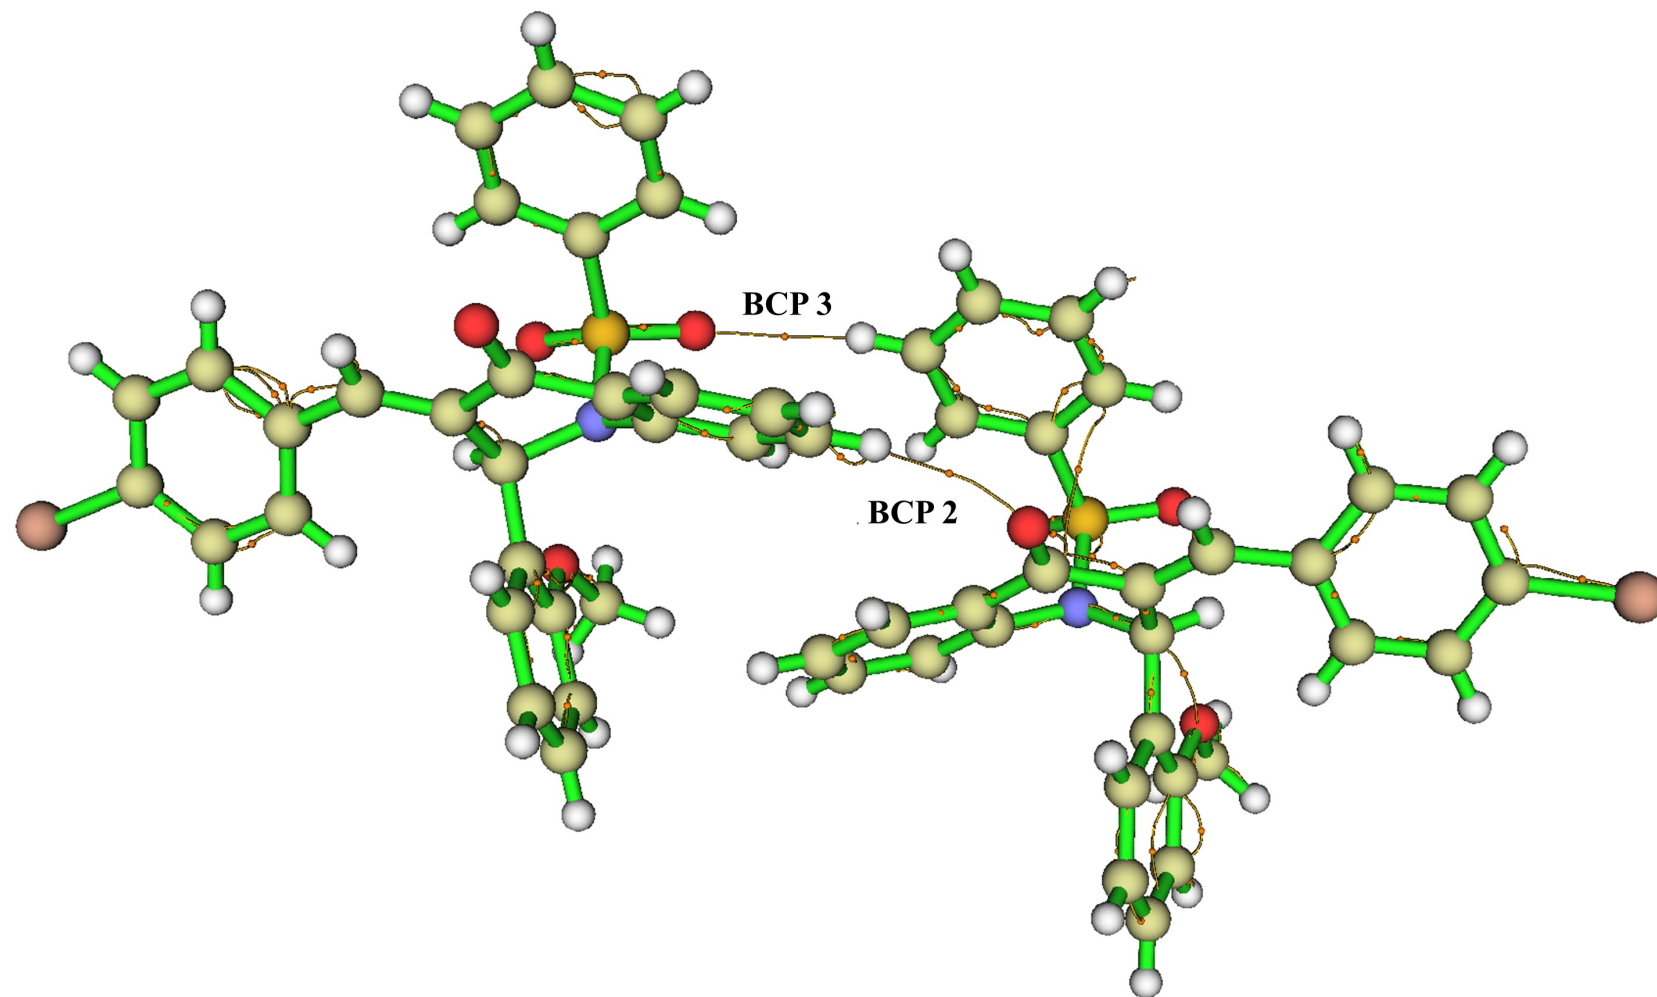

Supplement: d2nj00501h13.pdf [file d2nj00501h13.pdf]

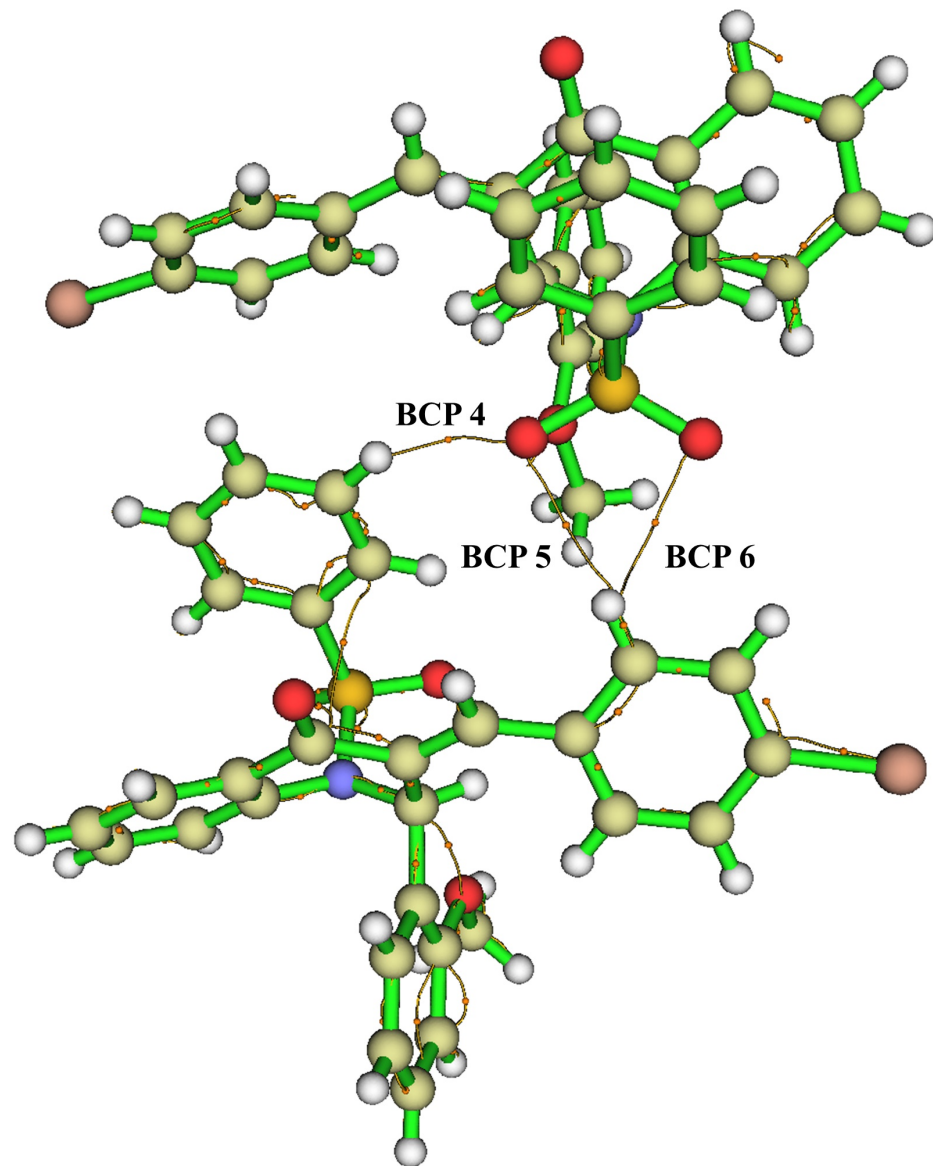

Supplement: d2nj00501h14.pdf [file d2nj00501h14.pdf]

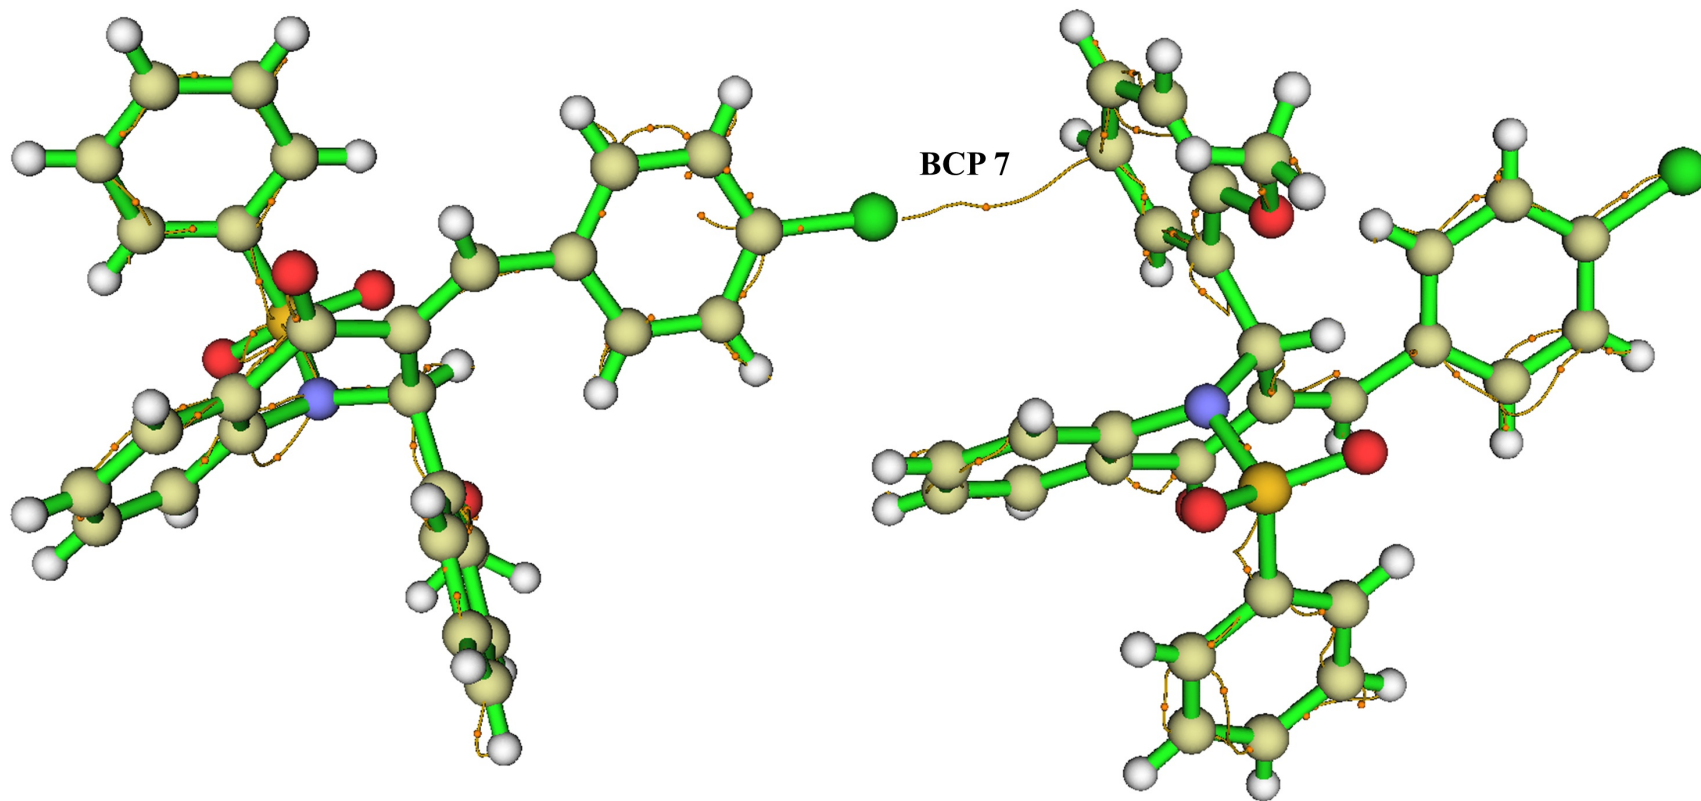

Supplement: d2nj00501h15.pdf [file d2nj00501h15.pdf]

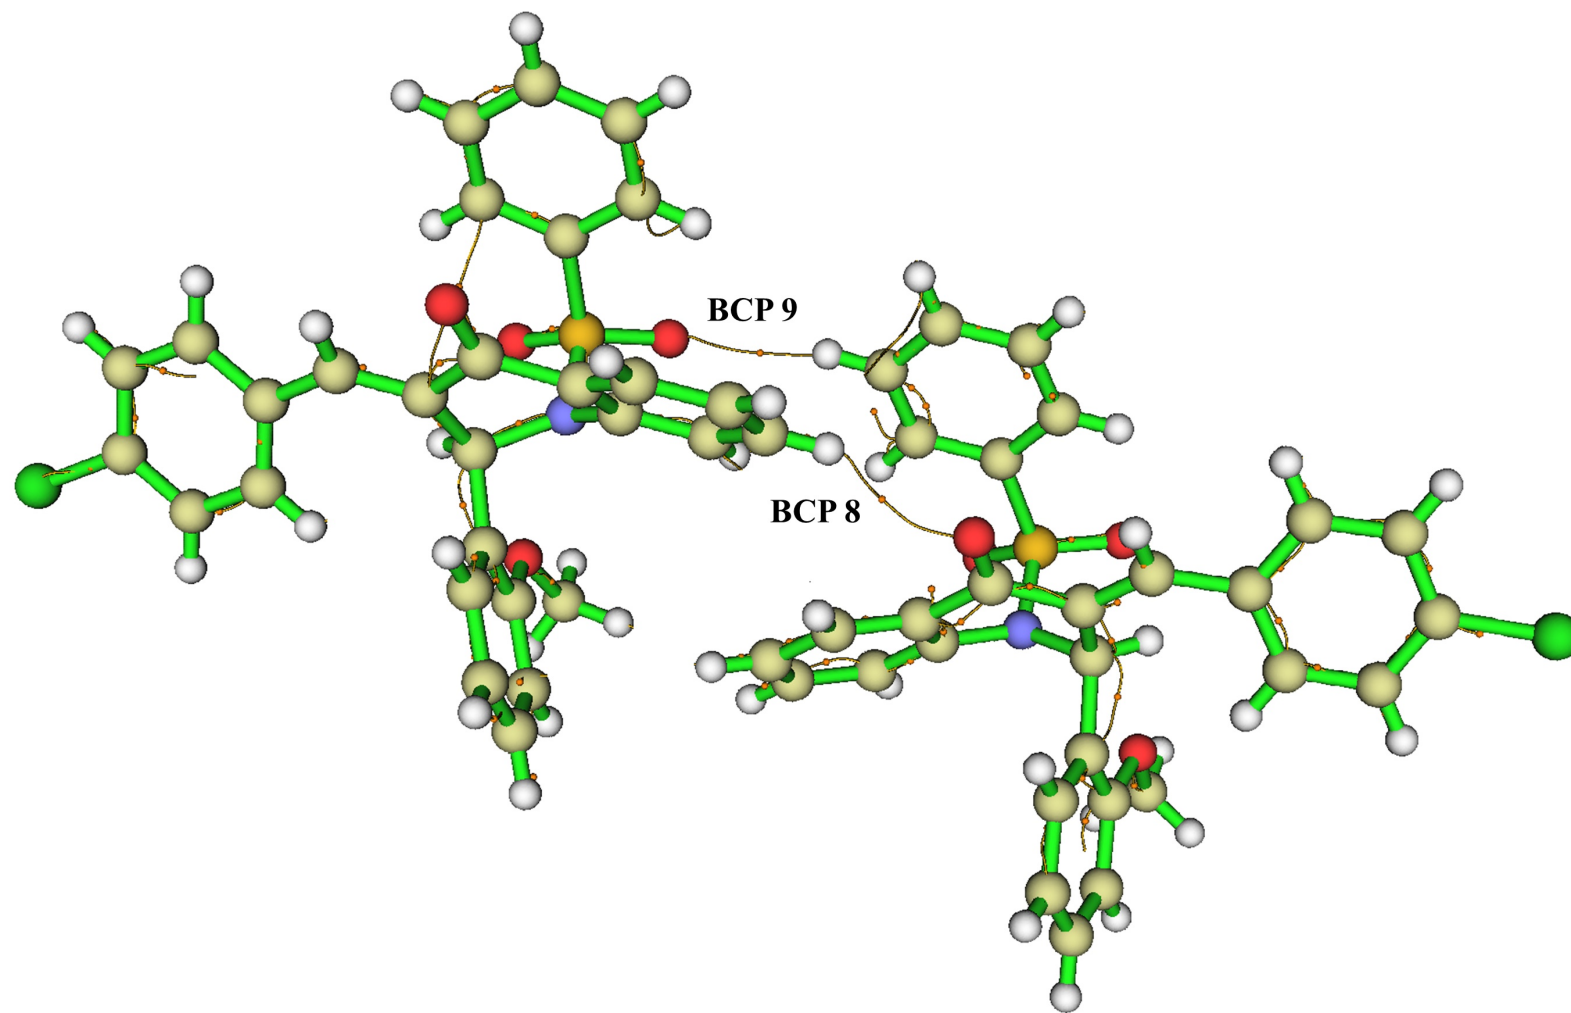

Supplement: d2nj00501h16.pdf [file d2nj00501h16.pdf]

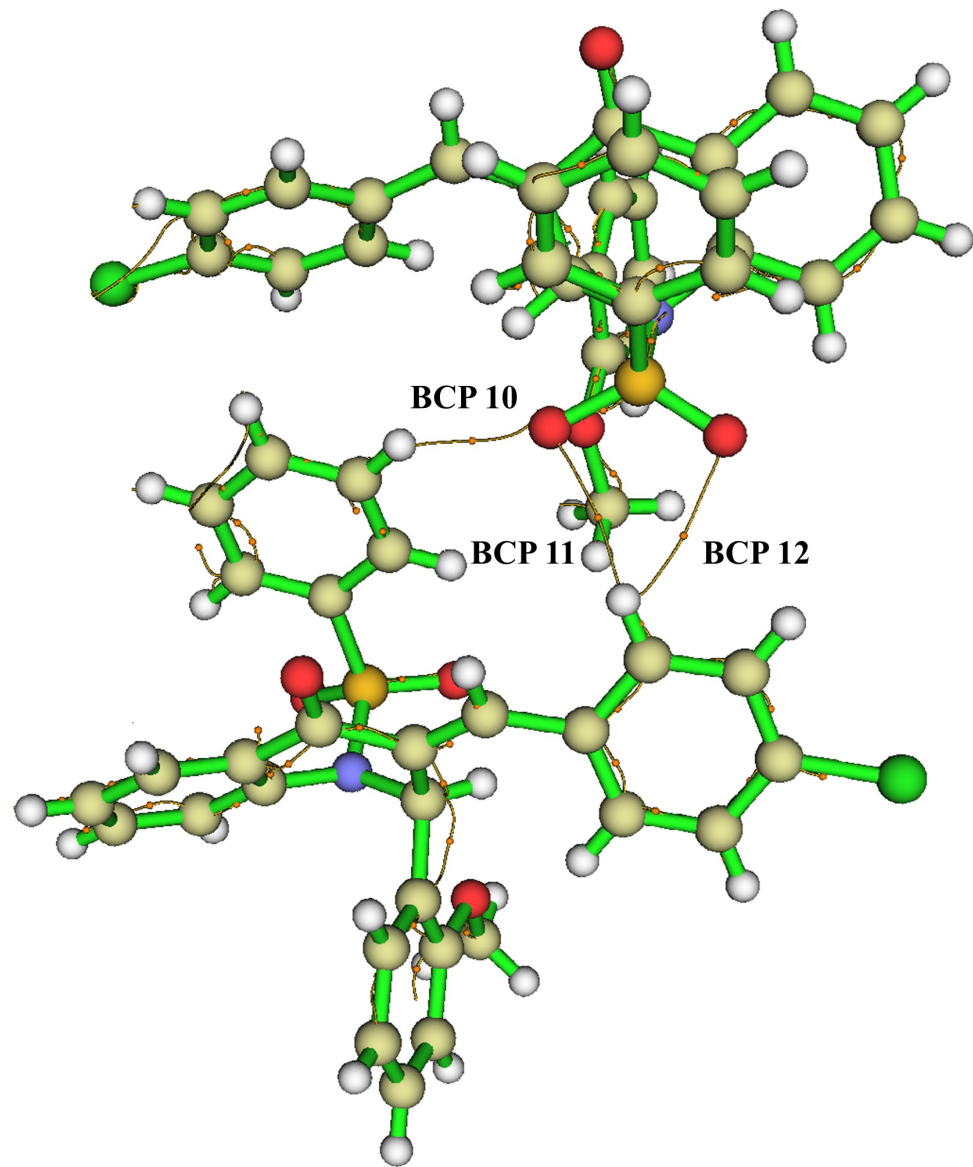

Supplement: d2nj00501h17.pdf [file d2nj00501h17.pdf]

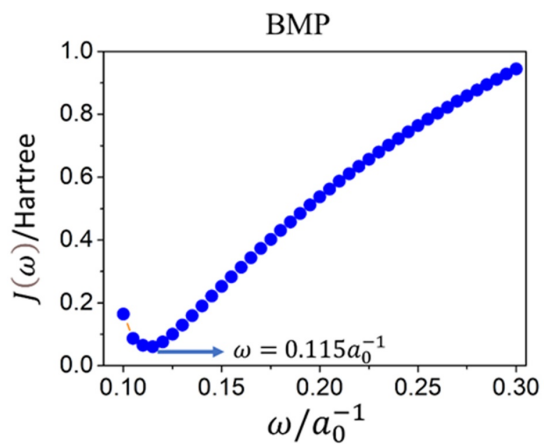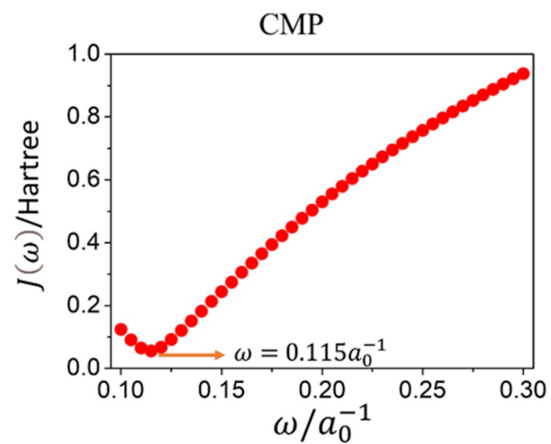

Supplement: d2nj00501h18.pdf [file d2nj00501h18.pdf]

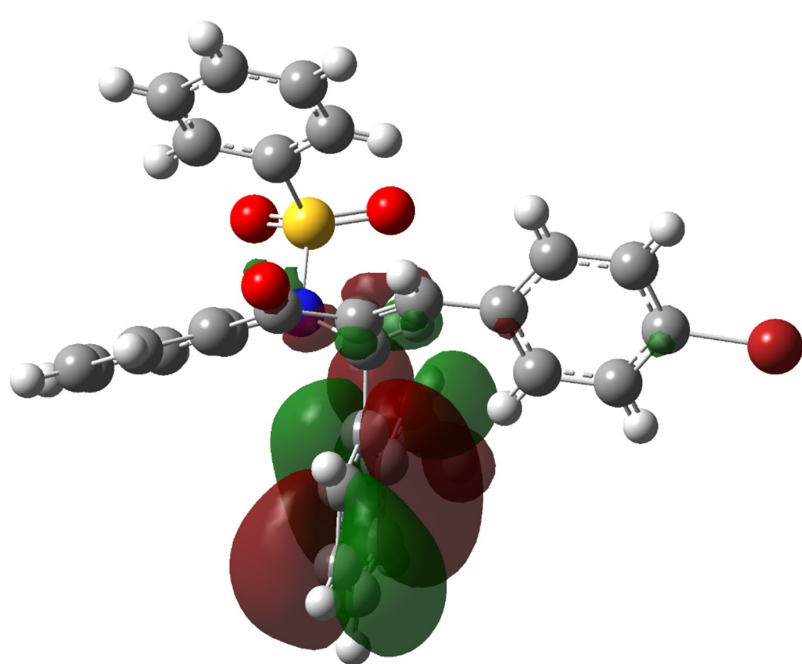

HOMO (-178.62 kcal/mol)

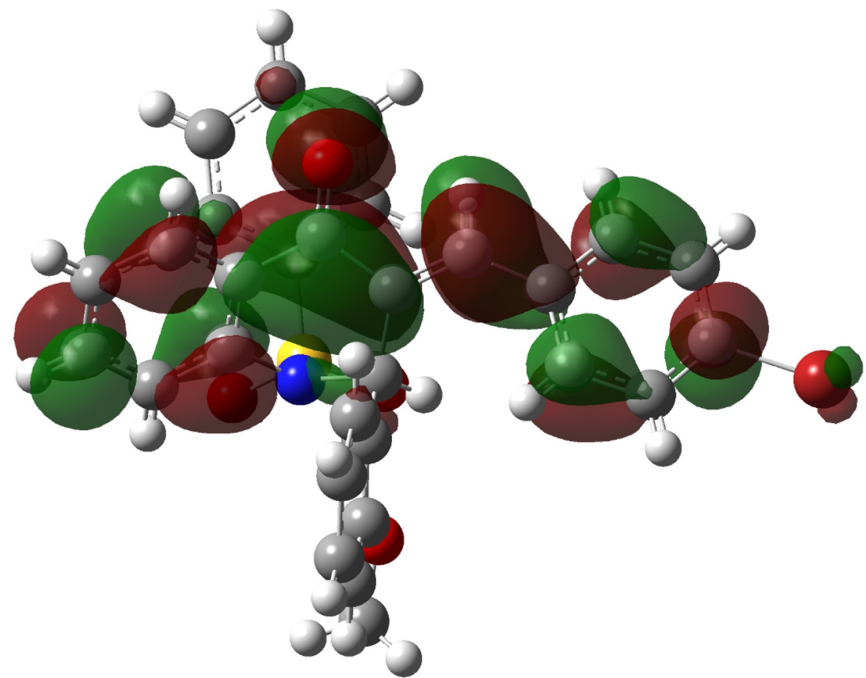

LUMO (-42.91 kcal/mol)

(a)

Supplement: d2nj00501h2.pdf [file d2nj00501h2.pdf]

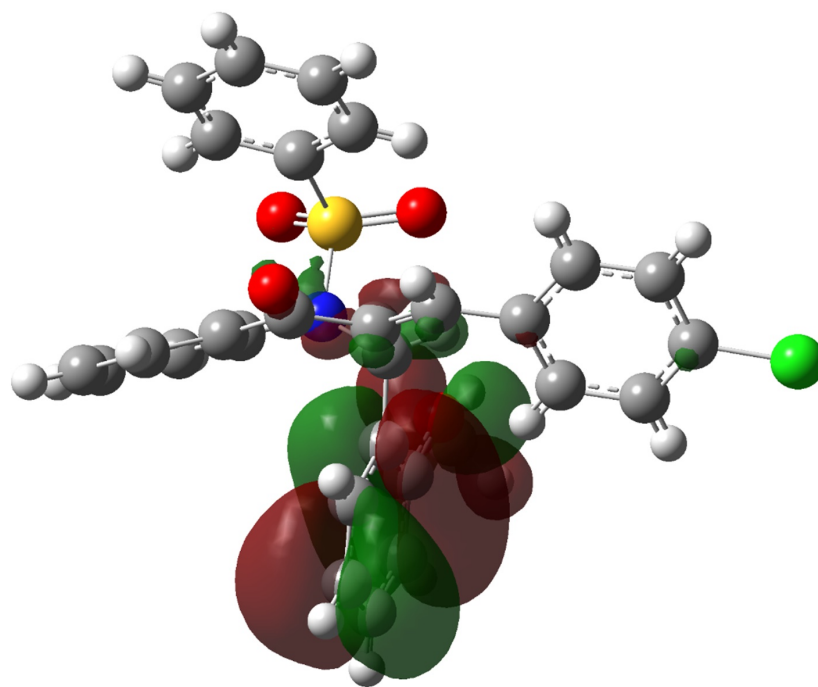

HOMO (-178.78 kcal/mol)

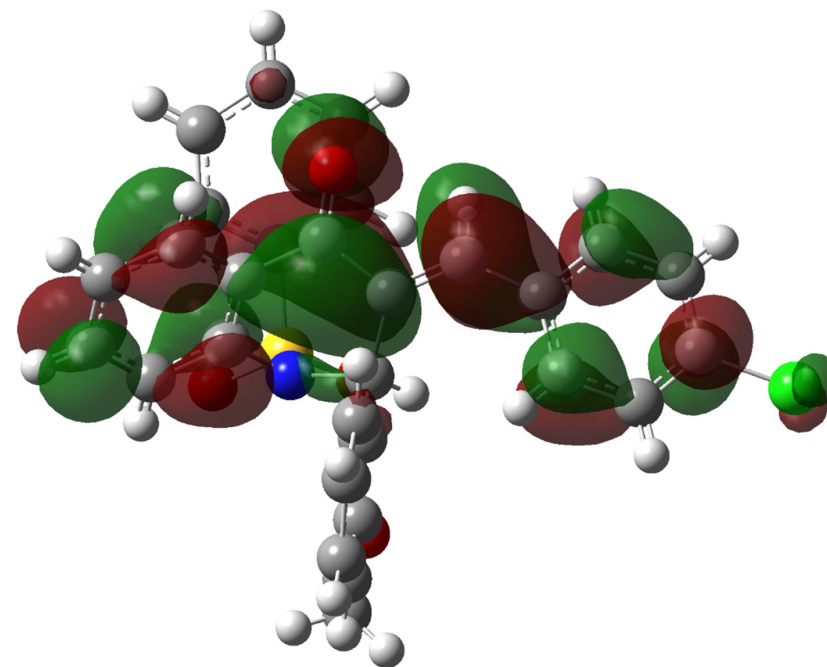

LUMO (-42.47 kcal/mol)

(b)

Supplement: d2nj00501h3.pdf [file d2nj00501h3.pdf]

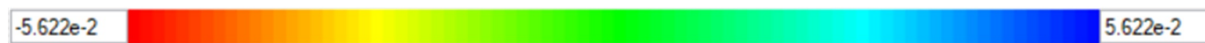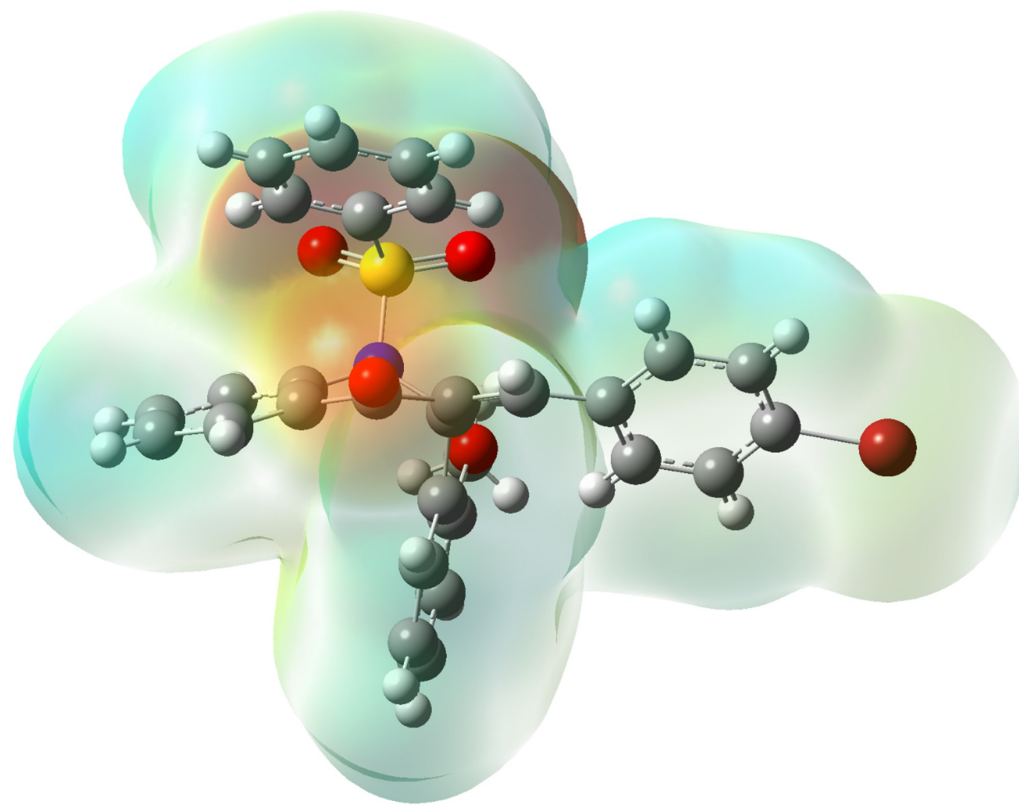

(a)

Supplement: d2nj00501h4.pdf [file d2nj00501h4.pdf]

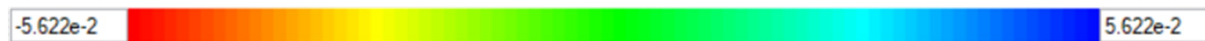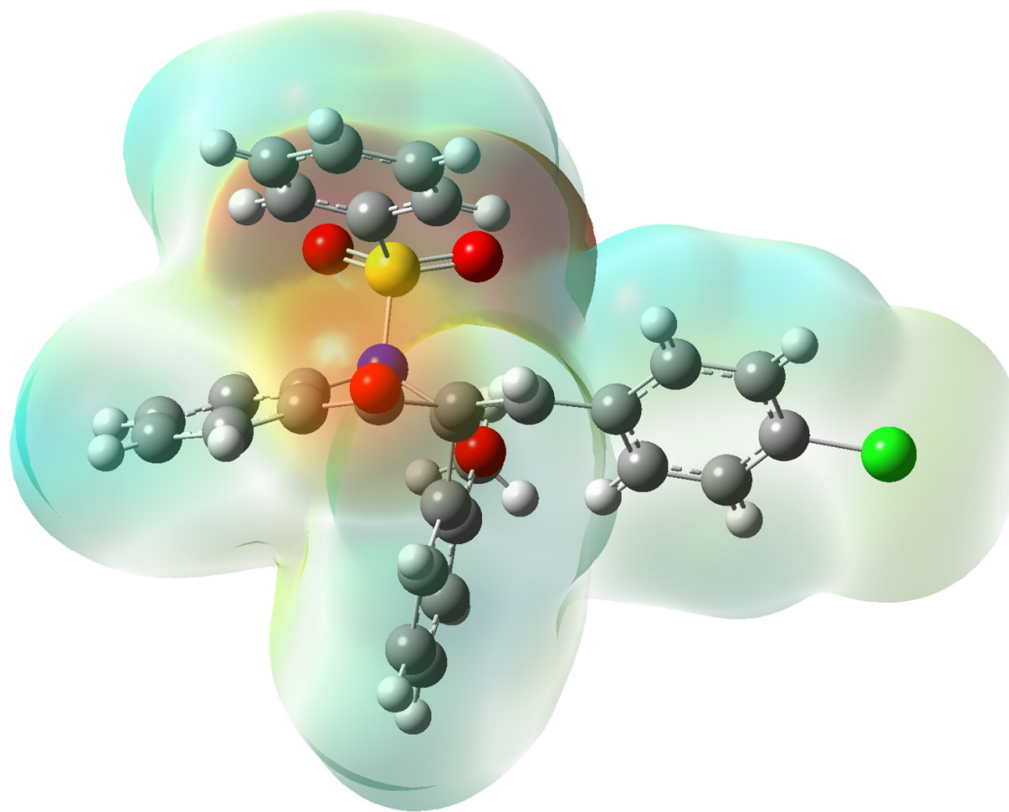

(b)

Supplement: d2nj00501h5.pdf [file d2nj00501h5.pdf]

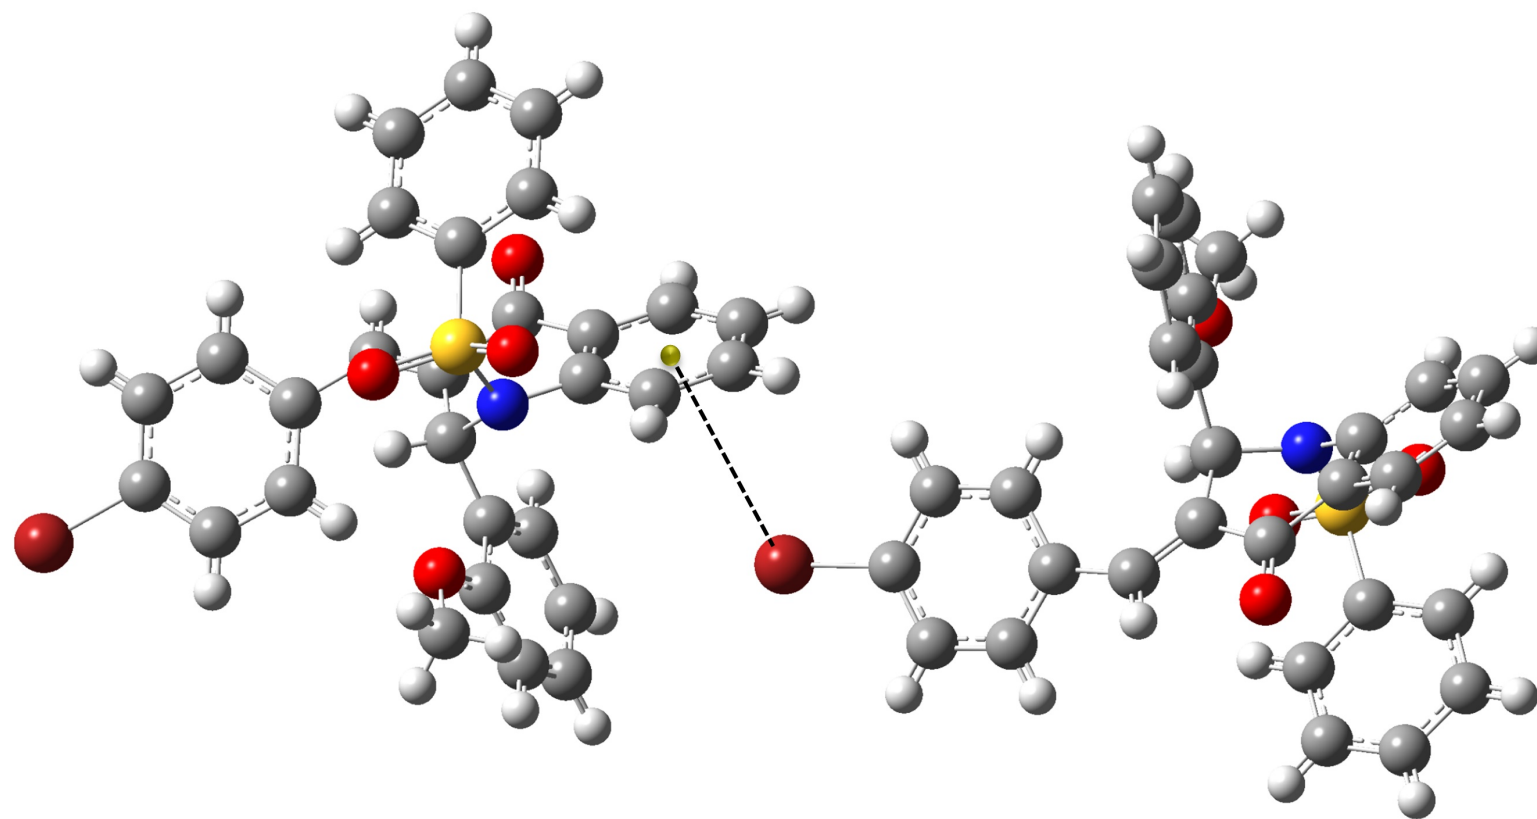

Supplement: d2nj00501h6.pdf [file d2nj00501h6.pdf]

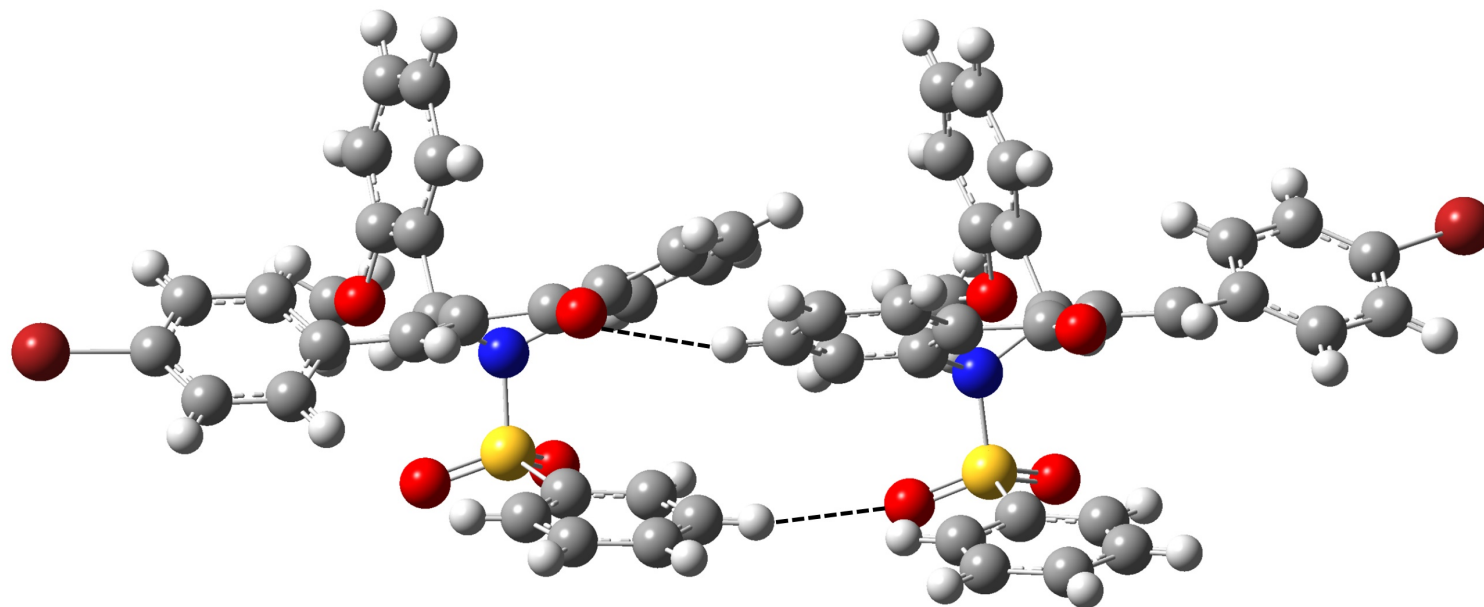

Supplement: d2nj00501h7.pdf [file d2nj00501h7.pdf]

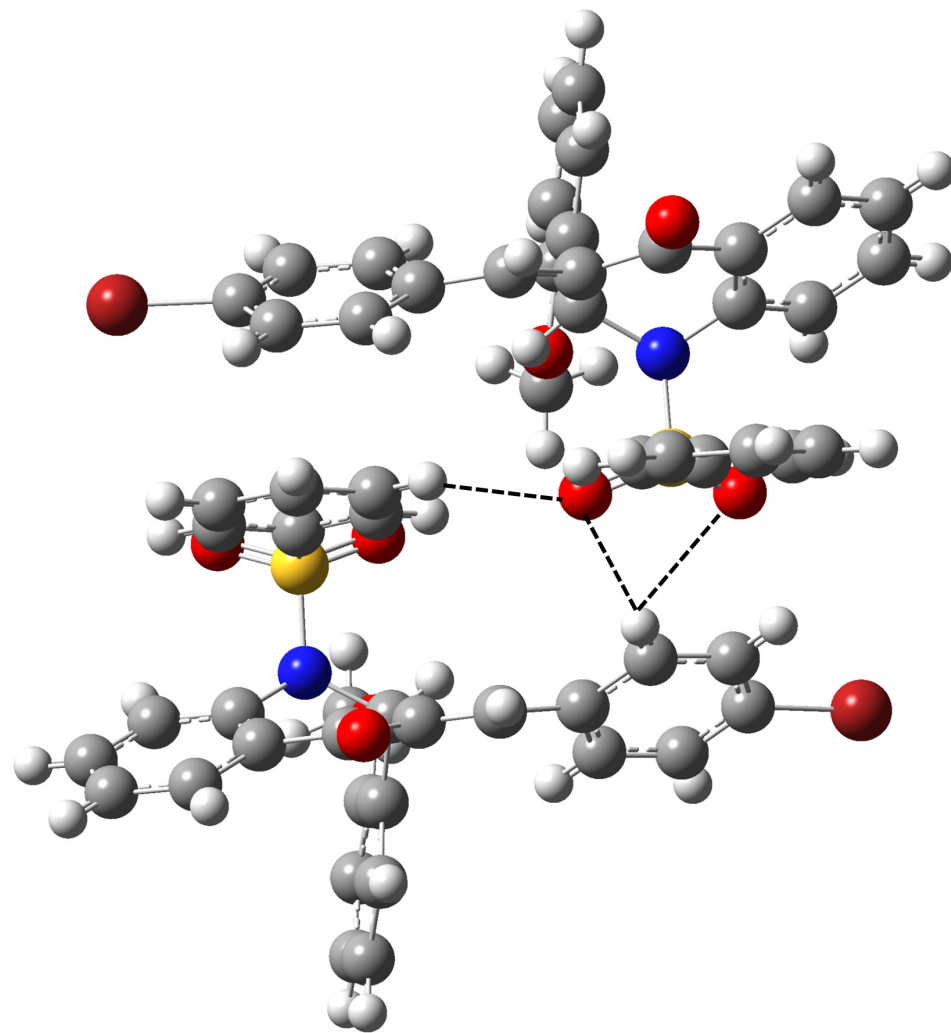

Supplement: d2nj00501h8.pdf [file d2nj00501h8.pdf]

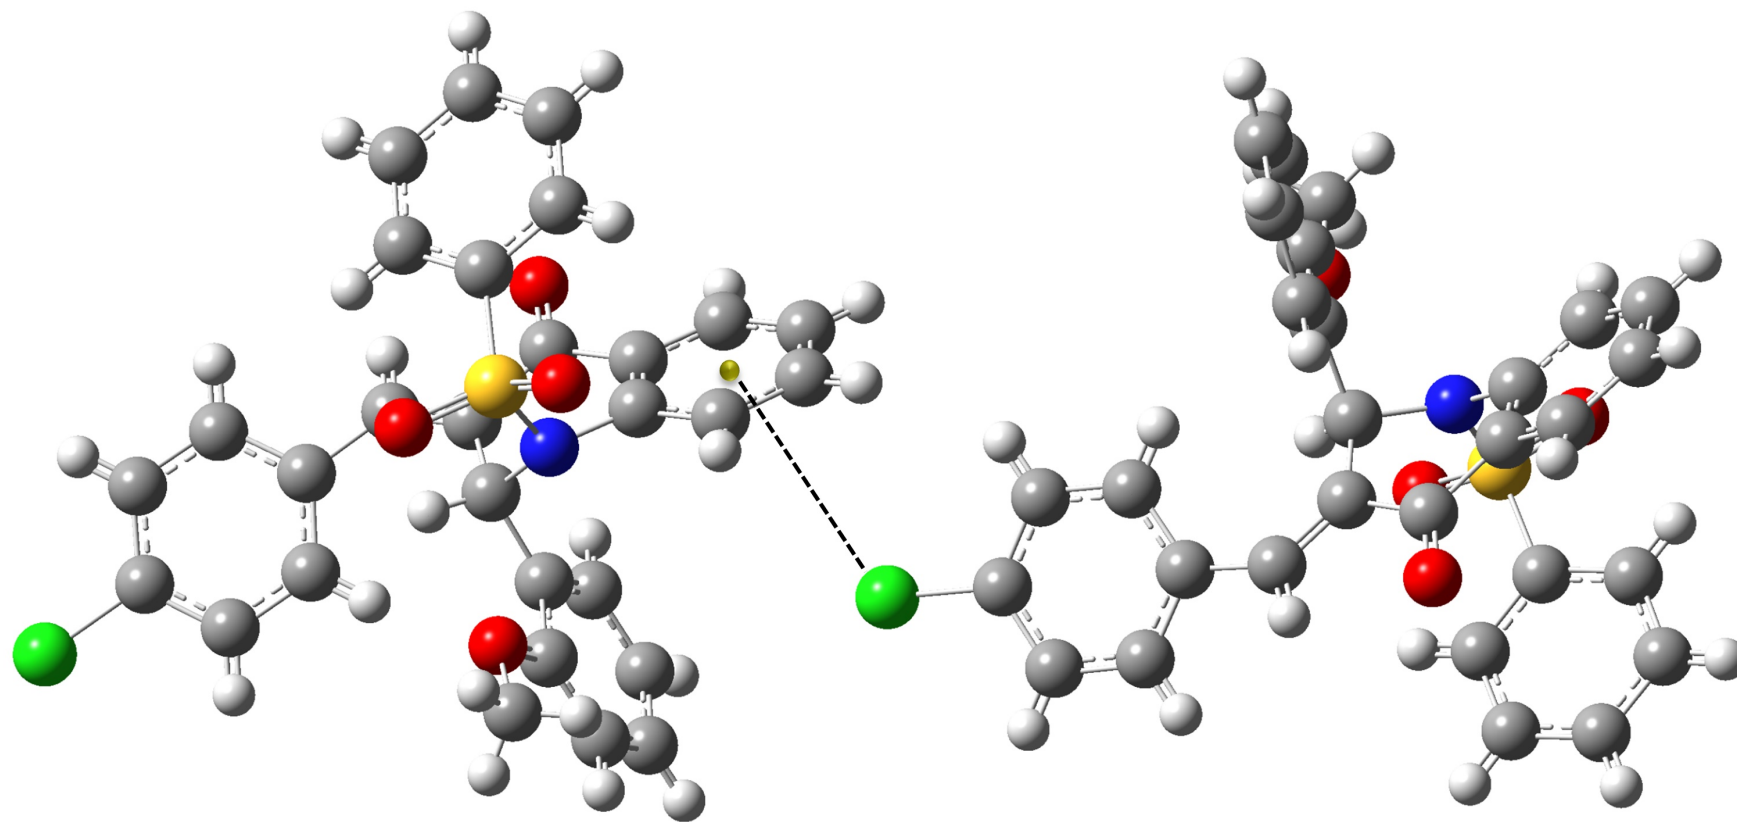

Supplement: d2nj00501h9.pdf [file d2nj00501h9.pdf]
